# Supplementary material for: Regulation, overexpression, and target gene identification of Potato Homeobox 15 (POTH15) – a class-I KNOX gene in potato
Source: PubMed Central journal article supplement (PMC5301930; doi:10.1093/jxb/erw205), 2016-05-23
Supplement: supp_erw205_supplementary_tables_S2_S4_figures_S1_S5.pdf [file supp_erw205_supplementary_tables_S2_S4_figures_S1_S5.pdf]

**Regulation, over-expression and target gene identification of *Potato Homeobox 15 (POTH15)* - a class-I *KNOX* gene in potato**

Ameya S. Mahajan<sup>1</sup>, Kirtikumar R. Kondhare<sup>1</sup>, Mohit P. Rajabhoj<sup>2</sup>, Amit Kumar<sup>1</sup>, Tejashree Ghate<sup>3</sup>, Nevedha Ravindran<sup>4</sup>, Farhat Habib<sup>1</sup>, Sundaresha Siddappa<sup>5</sup> and Anjan K. Banerjee<sup>1\*</sup>

**Table S2.** List of regulatory motifs in *POTH15* promoter predicted by PlantPan (Chang *et al.*, 2008).

| <b>Motif</b>      | <b>Number</b> |
|-------------------|---------------|
| AGL-3             | 2             |
| AG                | 10            |
| Athb-1            | 30            |
| ANT               | 1             |
| Athb-5            | 28            |
| Athb-9            | 6             |
| CDC-5             | 2             |
| RAV1              | 12            |
| ACGTATERD1        | 2             |
| ANAERO1CONSENSUS  | 2             |
| API               | 4             |
| ARR10             | 7             |
| ARR1AT            | 34            |
| AtMYC2            | 1             |
| Bellringer        | 7             |
| AGL-15            | 20            |
| CCA1              | 2             |
| ATHB33            | 74            |
| DPBF-1            | 1             |
| GARE              | 2             |
| GATABOX           | 23            |
| GBF5              | 3             |
| GT1CONSENSUS      | 45            |
| IBOX              | 2             |
| L1BOX             | 1             |
| MYB1              | 13            |
| MYCATERD1         | 1             |
| MYCATRD22         | 1             |
| MYCCONSENSUSAT    | 8             |
| POLASIG1          | 12            |
| PREATPRODHD       | 3             |
| SORLIP1           | 1             |
| SRE               | 3             |
| SURE              | 2             |
| SURECOREATSULTR11 | 3             |
| TAAAGSTKST1       | 11            |
| TBOX              | 1             |
| WBOX              | 2             |

**Table S3.** Number of reads obtained in the RNA-seq analysis and aligned to the potato genome.

| <b>Transgenic line</b>  | <b>Sample</b> | <b>Total no. of reads obtained</b> | <b>Mean read length (bp)</b> | <b>Overall alignment rate</b> |
|-------------------------|---------------|------------------------------------|------------------------------|-------------------------------|
| Control line (35S::GUS) | GUS-1A        | 35,326,000                         | 129                          | 46.6%                         |
|                         | GUS-2A        | 20,095,643                         | 131                          | 46.9%                         |
| POTH15 OE line (G8)     | G8-1A         | 32,012,002                         | 138                          | 33.9%                         |
|                         | G8-2A         | 37,166,422                         | 143                          | 33.9%                         |
|                         | G8-3A         | 53,506,123                         | 127                          | 51.5%                         |
| POTH15 OE line (E2-13)  | E2-13-1A      | 19,644,473                         | 131                          | 48.9%                         |
|                         | E2-13-2A      | 35,906,847                         | 116                          | 47.4%                         |
|                         | E2-13-3A      | 48,460,358                         | 128                          | 45.7%                         |

**Table S4.** Summary of differentially expressed (DE) genes obtained from RNA-seq analysis.

| <b>Comparison</b> | <b>Category</b>                           | <b>No. of DE genes</b> |
|-------------------|-------------------------------------------|------------------------|
| GUS vs G8         | Up-regulated                              | 1387                   |
|                   | Down-regulated                            | 683                    |
|                   | GUS specific                              | 12                     |
|                   | G8 specific                               | 136                    |
|                   | Total                                     | 2218                   |
|                   |                                           |                        |
| GUS vs E2-13      | Up-regulated                              | 2654                   |
|                   | Down-regulated                            | 2250                   |
|                   | GUS specific                              | 37                     |
|                   | E2-13 specific                            | 207                    |
|                   | Total                                     | 5148                   |
|                   |                                           |                        |
| G8 vs E2-13       | Up-regulated                              | 528                    |
|                   | Down-regulated                            | 617                    |
|                   | G8 specific                               | 2                      |
|                   | E2-13 specific                            | 4                      |
|                   | Total                                     | 1151                   |
|                   |                                           |                        |
|                   | Common between GUS vs G8 and GUS vs E2-13 | 2014                   |
|                   |                                           |                        |
|                   | All up-regulated                          | 4569                   |
|                   | All down-regulated                        | 3550                   |
|                   | Either GUS or G8 or E2-13 specific        | 398                    |
|                   | <b>Total DE genes</b>                     | <b>8517</b>            |

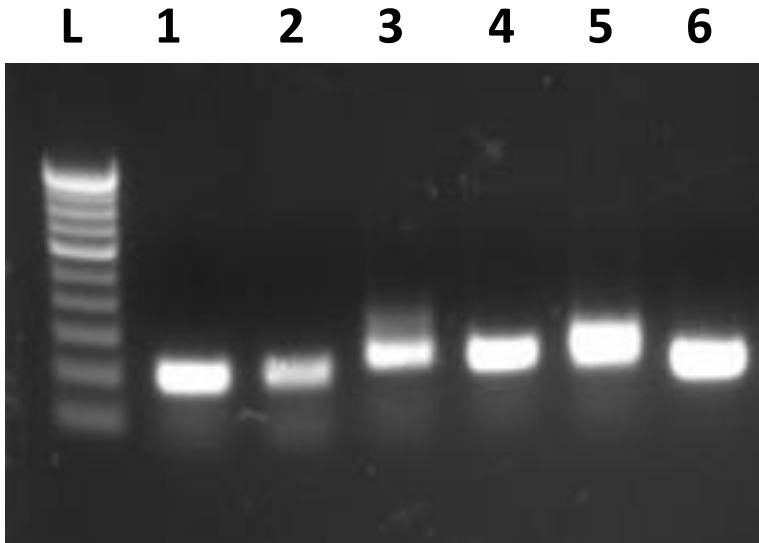

**L – Step up 100bp ladder**

**1 – POTH20 (Potato Homeobox 20) (KP335125 and KP335126)**

**2 – POTH15 (Potato Homeobox 15) (KJ477687)**

**3 – *StPetroselinum* (KJ477688)**

**4 - *StKn1* (KJ477691)**

**5 – *StHox1* (KJ477689)**

**6 – *StHox2* (KJ477690)**

**Fig. S1. KNOX genes in potato.** The putative sequences of KNOX genes in potato were obtained from PGSC database. The expressions of these genes were validated by RT-PCR. Further, the full-length transcript sequence for each of the genes was obtained by 5'-RACE and the sequences were validated and deposited in NCBI. The accession numbers are mentioned in brackets.

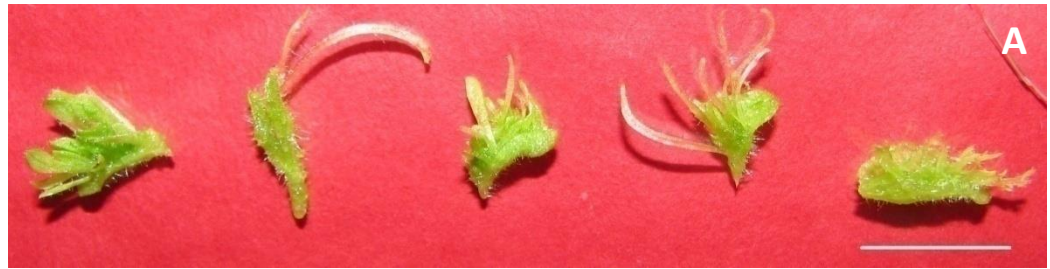

A

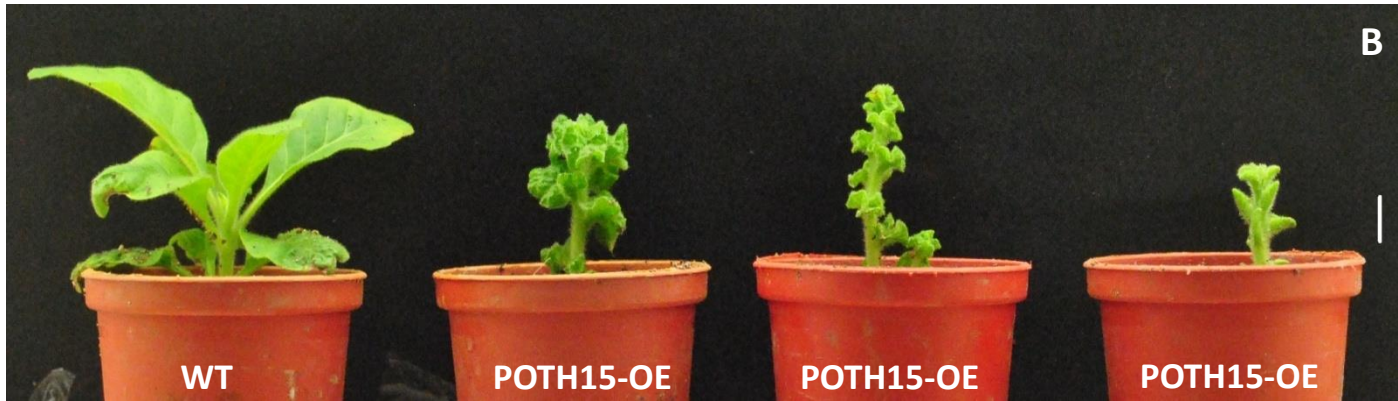

B

WT

POTH15-OE

POTH15-OE

POTH15-OE

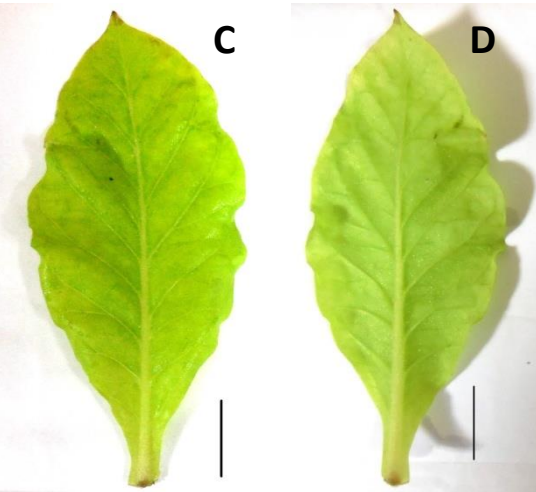

C

D

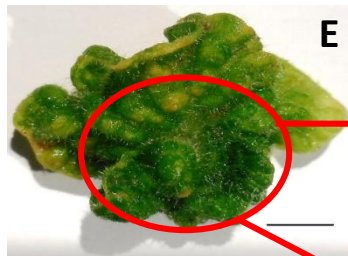

E

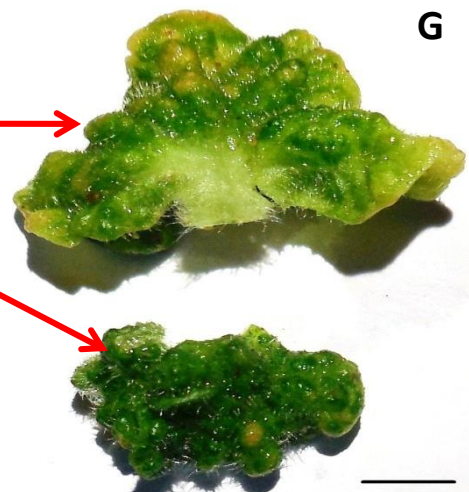

G

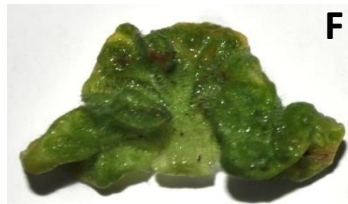

F

**Fig. S2. POTH15 over-expression drastically changes the plant architecture in tobacco (*Nicotiana tabacum* var *Petite Havana*).** Leaves of *in vitro* grown POTH15 over-expression lines of tobacco (A). Eight weeks old plants of wild-type (WT) and POTH15 over-expression (B) tobacco lines. The dorsal and ventral view of the leaves from wild-type (C and D) and POTH15 over-expression lines (E to G where G is a magnified view of E with two fused leaves separated). The mature leaves of POTH15 over-expression lines of tobacco showed leaf-on-leaf phenotype. The scale bars in A, B, C and D are 1 cm and scale bars in E, F and G are 5 mm.

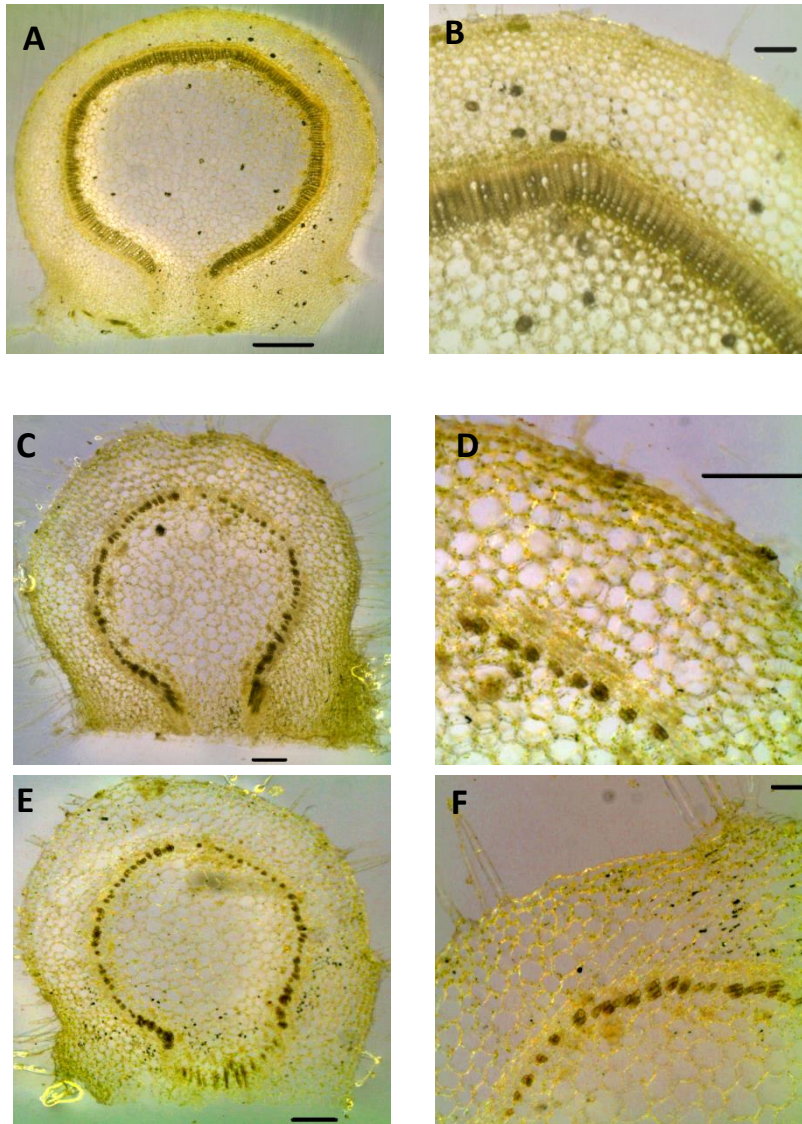

**Fig. S3. POTH15 over-expression in tobacco changes cell arrangements in stem.** Cross sections of stem of the wild-type (A) and POTH15 over-expression (C and E) lines of tobacco. B, D and F are magnified views of A, C and E, respectively. Scale bars in A, C, D and E are 50 microns, in B and F are 10 microns.

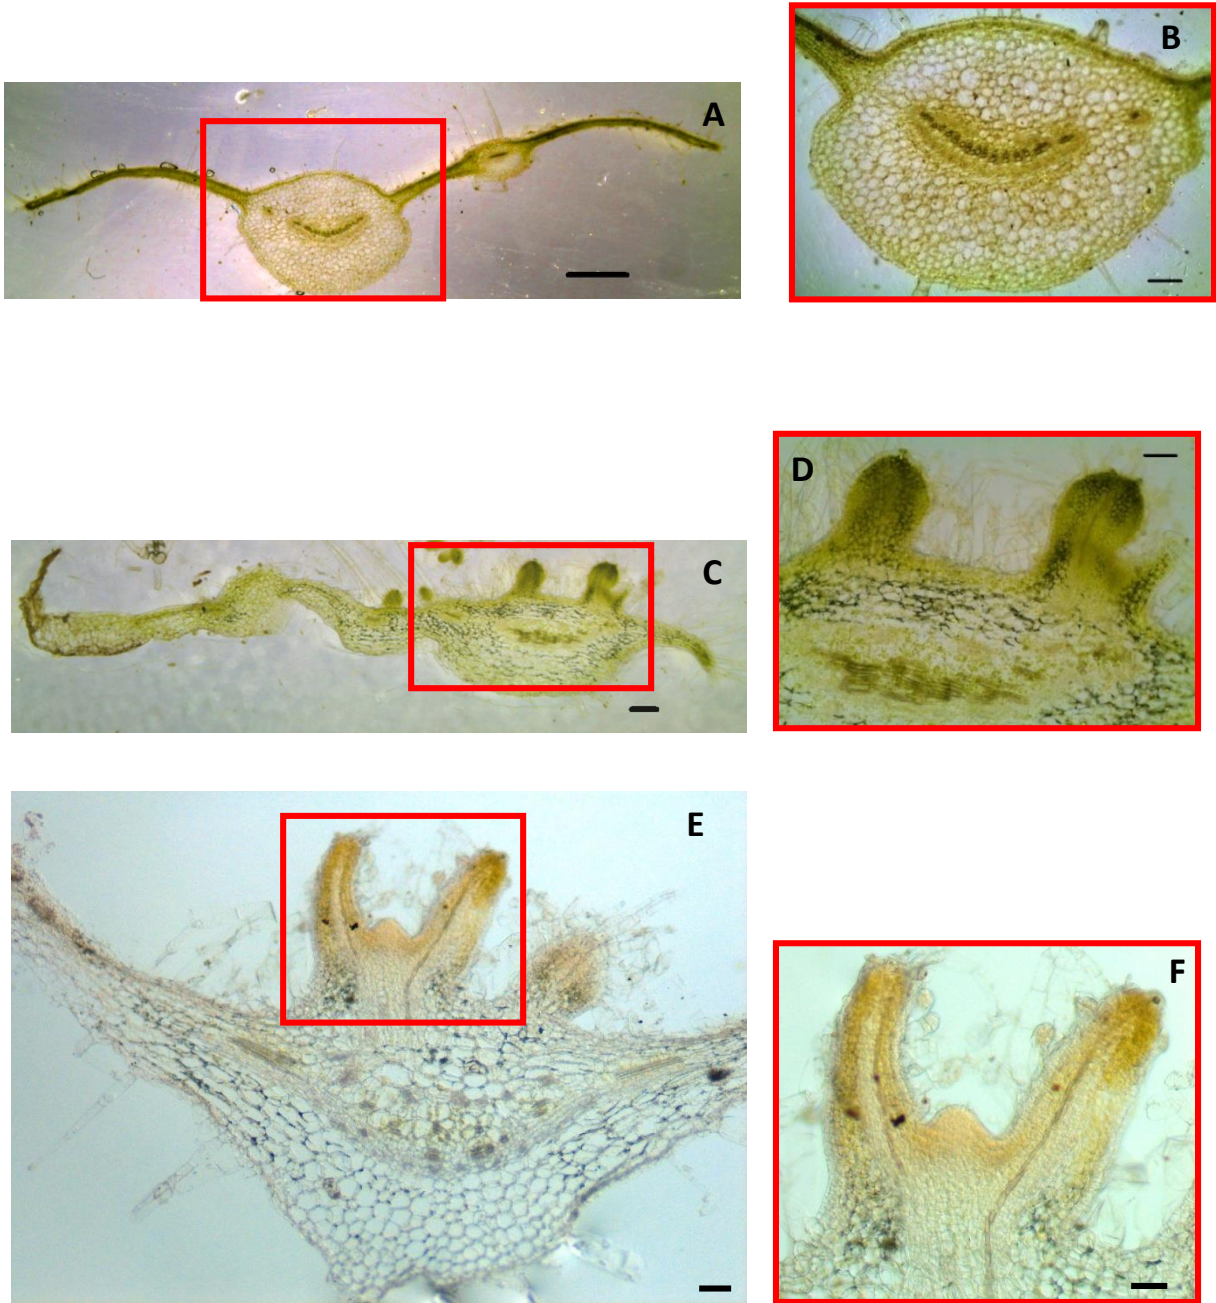

**Fig. S4. POTH15 over-expression in tobacco changes cell arrangements in leaves.** Cross sections of the leaves of the wild type (A) and POTH15 over-expression (C and E) lines of tobacco. B, D and F are magnified views of A, C and E, respectively. Meristem-like structures (D and F) were observed on POTH15 over-expression leaves.



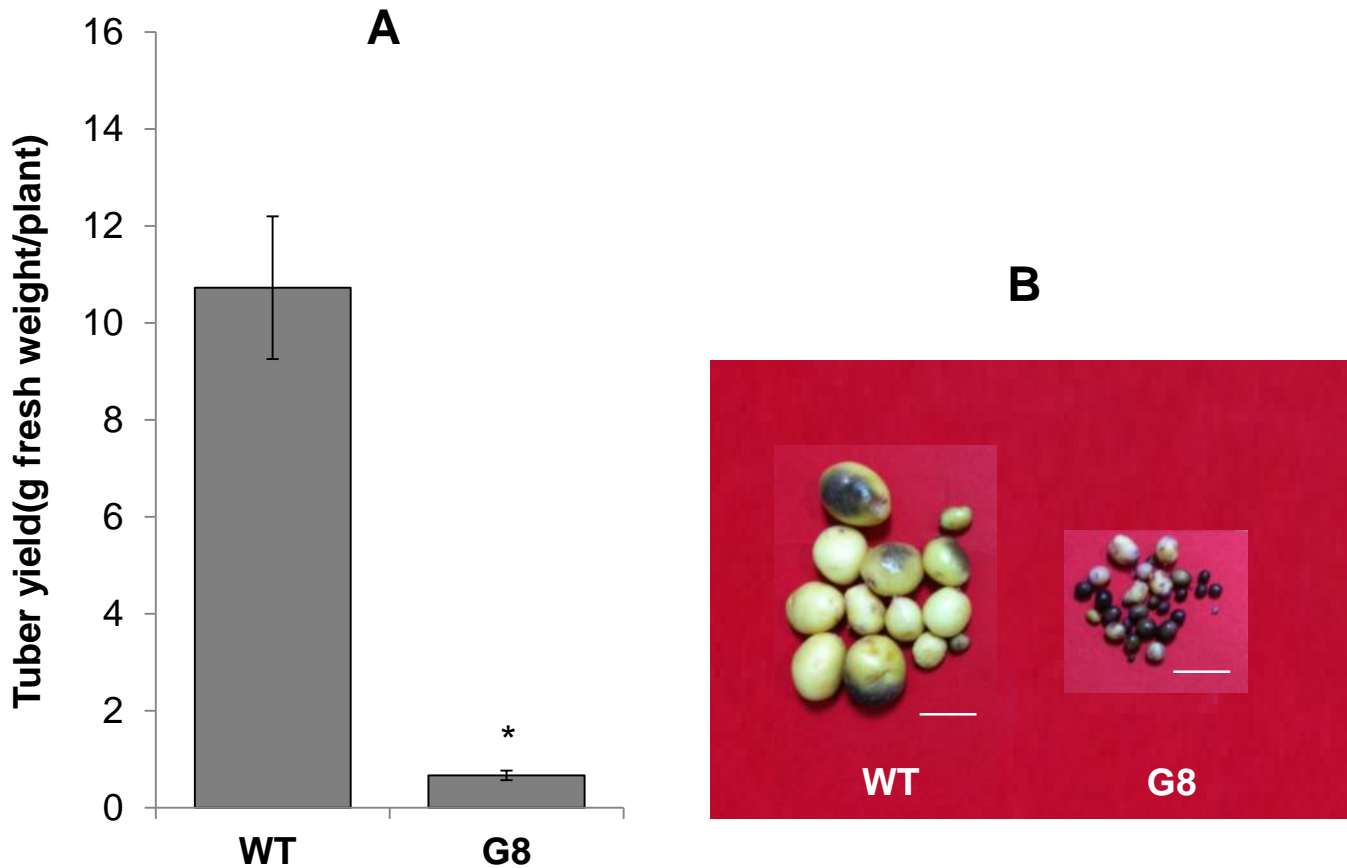

**Fig. S5. POTH15 over-expression reduces overall tuber yield under SD conditions.** Wild-type plants (WT) and POTH15 over-expression lines (G8 and E2-13) were grown in soil under LD conditions (16 h light, 8 h dark with light intensity of  $300 \text{ mmol m}^{-2} \text{ s}^{-1}$  at  $22 \pm 1 \text{ }^\circ\text{C}$ ) for 8 weeks, followed by 4 weeks under SD or LD conditions. POTH15 over-expression line- G8 showed reduced tuber yield compared to wild-type (WT) (B). The tubers depicted in (C) are the pooled harvest of six plants per line. POTH15 over-expression lines (G8 and E2-13) as well as WT did not produce tubers under LD conditions. Under SD conditions, over-expression line E2-13 did not produce tubers. Data were analysed by one way ANOVA. Error bars represent ( $\pm$ ) standard deviations for six biological replicates. Asterisk \* indicates significant difference at  $P \leq 0.05$ . Scale bars in C are 1 cm.
